# Supplementary material
Source: Springer Nature journal article supplement (https://www.springermedizin.de/resource/supplementary/12943_2009_697_MOESM5_ESM.pdf/9554602)

% Dead cells

75  
50  
25  
0

**DU 145**

**PC3**

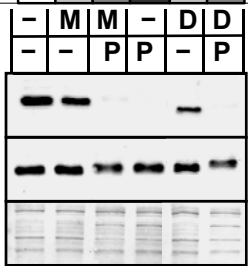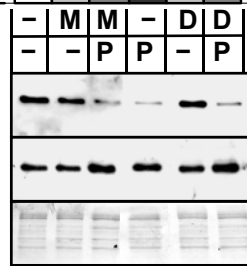

← P-IκBα  
← IκBα  
protein

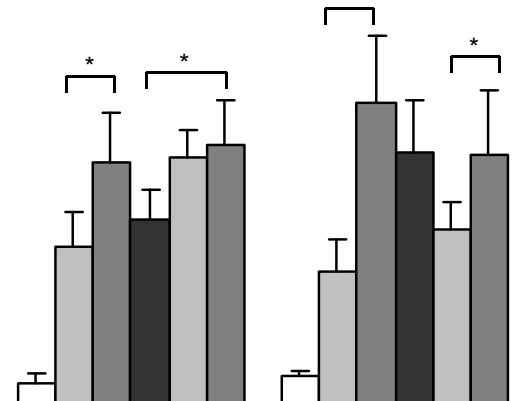

Supplement: MOESM5 [file 9554602]
